# Supplementary material for: Genetic and clinical characteristics including occurrence of testicular adrenal rest tumors in Slovak and Slovenian patients with congenital adrenal hyperplasia due to 21-hydroxylase deficiency
Source: Front Endocrinol (Lausanne). 2023 Mar 17;14:1134133. doi: 10.3389/fendo.2023.1134133 (PMC10064884; doi:10.3389/fendo.2023.1134133)
Supplement: Supplementary file 1 [file DataSheet_1.docx]

Supplementary Material

Genetic and clinical characteristics including occurrence of testicular adrenal rest tumors in Slovak and Slovenian patients with congenital adrenal hyperplasia due to 21-hydroxylase deficiency

Robert Saho1, Vita Dolzan2, Mojca Zerjav Tansek4,5, Andrea Pastorakova6, Robert Petrovic6, Maria Knapkova7, Katarina Trebusak Podkrajsek2,8, Jasna Suput Omladic4,5, Sara Bertok5, Magdalena Avbelj Stefanija4,5, Primoz Kotnik4,5, Tadej Battelino4,5, Zuzana Pribilincova3, Urh Groselj4,5

*** Correspondence:** Uhr Groselj [urh.groselj@kclj.si](mailto:urh.groselj@kclj.si)

Zuzana Pribilincova [zpribilincova@gmail.com](mailto:zpribilincova@gmail.com)

# Supplementary Figures and Tables

For more information on Supplementary Material and for details on the different file types accepted, please see [here](https://www.frontiersin.org/guidelines/author-guidelines#supplementary-material).

**Supplementary TABLE 1 |** *CYP21A2* haplotypes and clinical phenotypes of the cohort

| ***CYP21A2* haplotype (alelle 1 / alelle 2)** | **CAH phenotype** | | |
| --- | --- | --- | --- |
| **SW-CAH** | **SV-CAH** | **NC-CAH** |
| del / del | 8 | 0 | 0 |
| del / del 8 bp | 2 | 0 | 0 |
| del / p.Arg409Cys | 1 | 0 | 0 |
| del/conv / prom.conv | 1 | 0 | 0 |
| del / p.Leu307Phefs*5 + p.Gln319Ter | 1 | 0 | 0 |
| del / conv + c.293-13A/C>G + p.Pro31Leu | 1 | 0 | 0 |
| del / prom.conv + p.Pro31Leu + p.Als15Thr | 2 | 0 | 0 |
| p.Arg317Ter / c.293-13A/C>G + p.Val282Leu | 1 | 0 | 0 |
| p.Arg357Trp / c.293-13A/C>G | 1 | 0 | 0 |
| cluster ex6 / c.293-13A/C>G | 0 | 1 | 0 |
| p.Pro454Ser + cluster ex6 + p.Ile172Asn/ c.293-13A/C>G | 1 | 0 | 0 |
| c.293-13A/C>G / del/conv | 10 | 0 | 0 |
| c.293-13A/C>G + p.Pro31Leu / del/conv | 1 | 0 | 0 |
| c.293-13A/C>G / c.293-13A/C>G + p.Gln319Ter | 1 | 0 | 0 |
| c.293-13A/C>G / prom.conv + del 8 bp | 1 | 0 | 0 |
| c.293-13A/C>G + p.Val282Leu / del | 1 | 0 | 0 |
| c.293-13A/C>G / del 8 bp + p.Pro454Ser | 1 | 0 | 0 |
| c.293-13A/C>G + cluster ex6 + p.Val282Leu + p.Gln319Ter  / prom.konv + p.Leu307Phefs*5 + p.GIn318Ter | 2 | 0 | 0 |
| p.Leu307Phefs*5 / p.Leu307Phefs*5 | 1 | 0 | 0 |
| p.Leu307Phefs*5 / c.293-13A/C>G | 2 | 0 | 0 |
| p.Gln319Ter / c.293-13A/C>G | 2 | 0 | 0 |
| c.293-13A/C>G / p.Leu307Phefs*5 | 1 | 0 | 0 |
| c.293-13A/C>G / c.293-13A/C>G | 11 | 0 | 0 |
| c.293-13A/C>G / p.Arg355Cys | 1 | 0 | 0 |
| c.293-13A/C>G / c.293-13A/C>G + p.Pro454Ser | 2 | 0 | 0 |
| p.Ile172Asn / p.Ile172Asn | 0 | 1 | 0 |
| p.Ile172Asn/ del | 1 | 5 | 0 |
| p.Ile172Asn / c.293-13A/C>G | 3 | 2 | 1 |
| prom.konv / c.293-13A/C>G | 0 | 0 | 1 |
| p.Arg357GIn / p.Arg357GIn | 0 | 1 | 0 |
| p.Arg484Pro / c.293-13A/C>G | 1 | 0 | 0 |
| p.Pro31Leu / c.293-13A/C>G | 1 | 2 | 2 |
| p.Pro31Leu / p.Arg357Trp | 0 | 1 | 0 |
| p.Pro31Leu / p.Pro454Ser | 1 | 0 | 0 |
| p.Pro31Leu + prom.conv / del | 0 | 0 | 1 |
| p.Pro31Leu + prom.conv / + p.Gln319Ter | 0 | 1 | 0 |
| p.Val282Leu / c.293-13A/C>G | 0 | 1 | 2 |
| p.Val282Leu / p.Ile172Asn | 0 | 0 | 2 |
| p.Val282Leu / del/conv | 0 | 0 | 6 |
| p.Val282Leu / del 8 bp | 0 | 0 | 1 |
| p.Val282Leu / + p.Gln319Ter | 0 | 0 | 1 |
| p.Val282Leu / c.293-13A/C>G + p.Pro454Ser | 0 | 1 | 0 |
| p.Pro454Ser / del | 0 | 0 | 1 |
| p.Val282Leu / p.Pro31Leu | 0 | 0 | 2 |
| p.Asn493Ser / p.Asn493Ser + T-107C | 0 | 0 | 1 |
| **Together** | **63** | **16** | **21** |

Abbreviations: *CAH* congenital adrenal hyperplasia, *SW-CAH* salt-wasting form, *SV-CAH* simple virilizing form, *NC-CAH* non-classic form, *del* CYP21 gene deletion, *prom conv* gene conversion in promoter region, *conv* large or small, del 8 bp deletion in exon 3, *cluster ex6* cluster mutation in exon6

**Supplementary TABLE 2 |** Genotype-phenotype correlations in the cohort

| **Mutation group** | | | **Observed phenotype** | | | | | | **Relative frequency of the predicted phenotype** |
| --- | --- | --- | --- | --- | --- | --- | --- | --- | --- |
| **SW-CAH** | | **SV-CAH** | | **NC-CAH** | |
| **Allele 1** | **Allele 2** | **Predicted phenotype** | **SK** | **SI** | **SK** | **SI** | **SK** | **SI** |
| **0** | **0** | **SW-CAH (0)** | 7 | 11 | 0 | 1 | 0 | 0 | 94.74 % |
| **A** | **0** | **SW-CAH (A)** | 9 | 14 | 0 | 1 | 0 | 0 | 95.83% |
| **A** | **A** | **SW- CAH (A)** | 8 | 5 | 0 | 0 | 0 | 0 | 100.00% |
| **B** | **0** | **SV- CAH (B)** | 1 | 1 | 2 | 3 | 0 | 1 | 62.50% |
| **B** | **A** | **SV-CAH (B)** | 2 | 2 | 0 | 2 | 1 | 1 | 25.00% |
| **B** | **B** | **SV-CAH (B)** | 0 | 0 | 1 | 1 | 0 | 0 | 100.00% |
| **C** | **0** | **NC-CAH (C)** | 0 | 0 | 1 | 0 | 3 | 6 | 90.00% |
| **C** | **A** | **NC-CAH (C)** | 1 | 0 | 1 | 3 | 0 | 4 | 44.44% |
| **C** | **B** | **NC-CAG (C)** | 0 | 0 | 0 | 0 | 1 | 1 | 100.00% |
| **C** | **C** | **NC-CAH (C)** | 0 | 1 | 0 | 0 | 1 | 1 | 66.67% |
| **Unclassified (D)** | | | | | | | | |  |
| p.Arg355Cy s | **A** | **Unclassified (D)** | 1 | 0 | 0 | 0 | 0 | 0 |
| p.Asn493Ser | p.Asn493Ser + T-107C | **Unclassified (D)** | 0 | 0 | 0 | 0 | 0 | 1 |

Abbreviations: *CAH* congenital adrenal hyperplasia, *SW-CAH* salt-wasting form, *SV-CAH* simple virilizing form, *NC-CAH* non-classic form, *SK* Slovakia, *SI* Slovenia
